# Supplementary material
Source: MDPI journal article supplement (https://www.mdpi.com/2313-0105/10/2/48)
Supplement: s1 [file s1]

# Effect of Mn substitution on $\text{GeFe}_2\text{O}_4$ as an anode for sodium ion batteries

Marco Ambrosetti, Walter Rocchetta, Irene Quinzeni, Chiara Milanese, Vittorio Berbenni, Marcella Bini

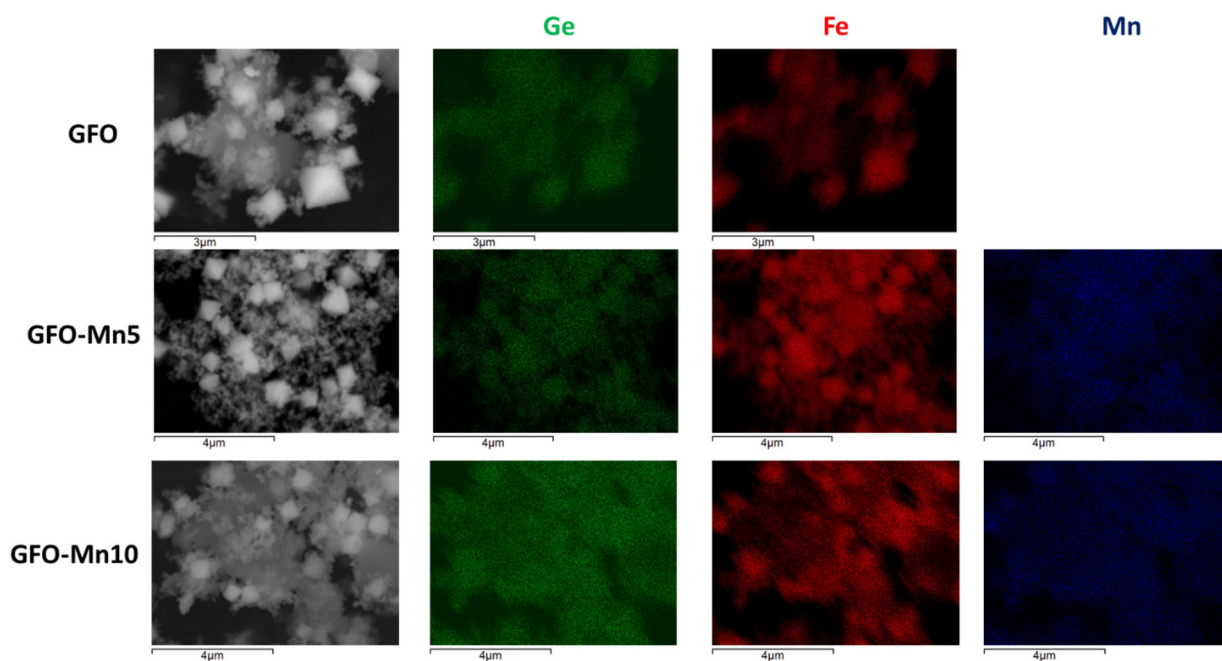

Fig. S1 – SEM images and corresponding EDS maps for Ge (green), Fe (red), and Mn (blue) acquired on the three prepared samples.

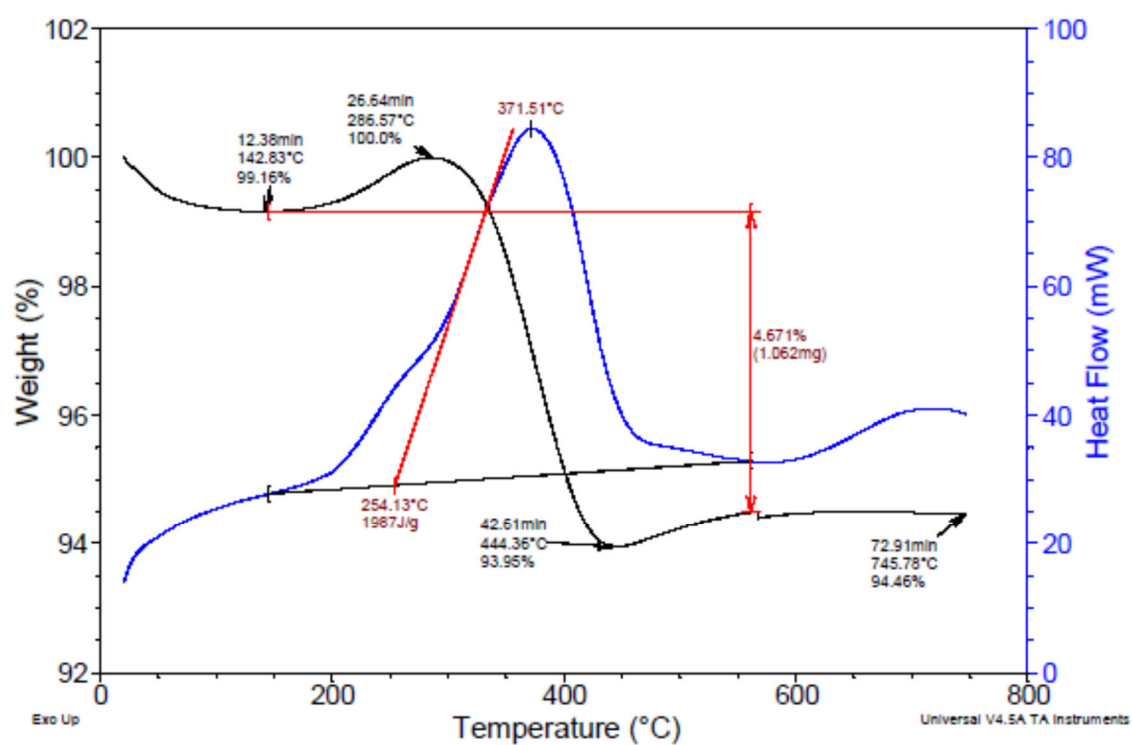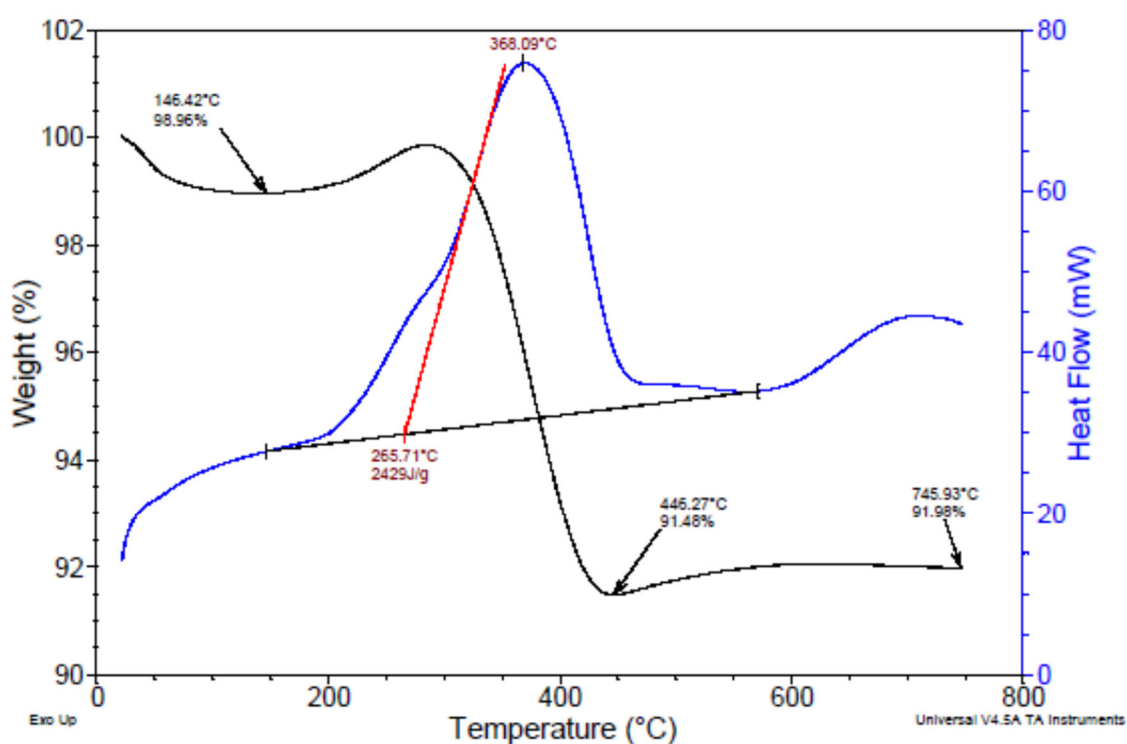

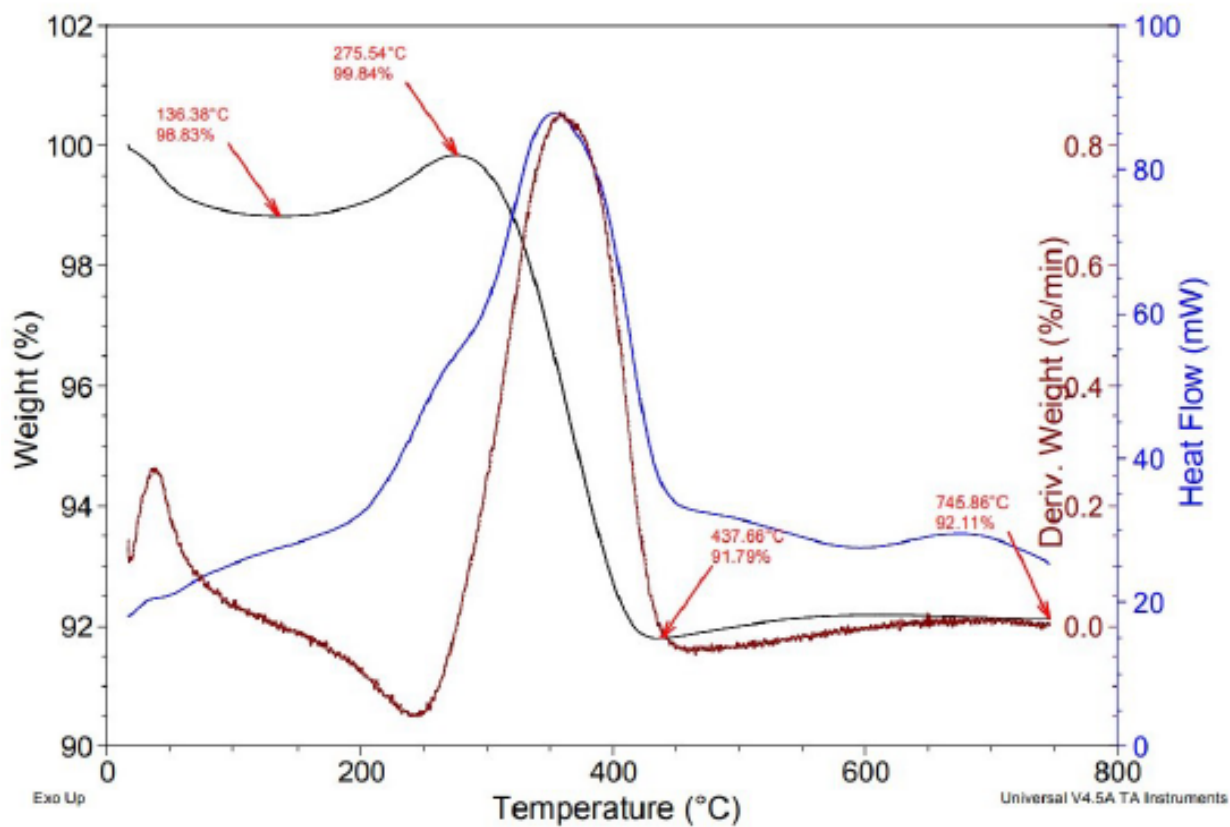

Fig. S2 – TG/DSC measurements, from top to bottom, of GFO-C, GFO-Mn5-C and GFO-Mn10-C samples.

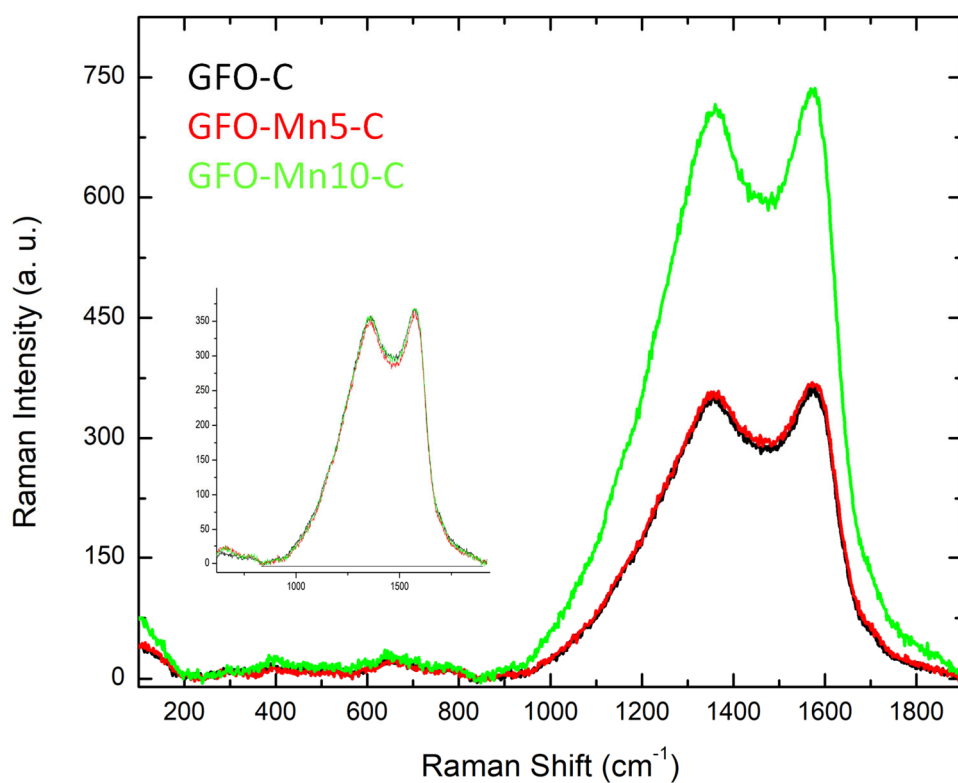

Fig. S3 – Micro-Raman spectra of GFO coated samples. In the inset, the comparison among the normalized spectra is also shown.
